# Supplementary material
Source: PubMed Central journal article supplement (PMC4151608)

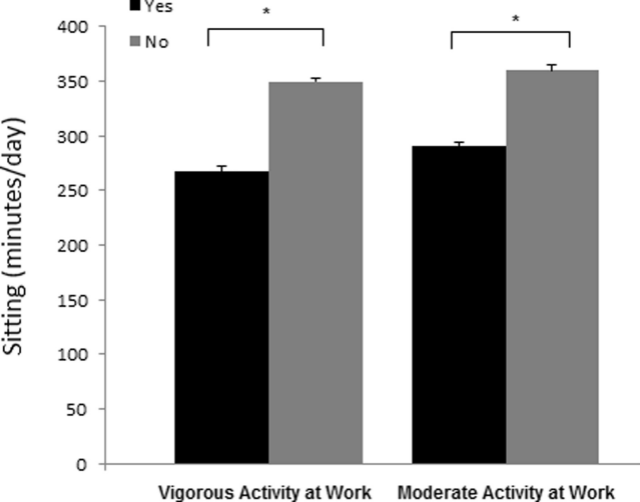

Supplement: NIHMS610471-supplement-Suppl_Table_1.pdf [file NIHMS610471-supplement-Suppl_Table_1.pdf]
